# Supplementary material
Source: publisher figshare collection journal article supplement (https://tandf.figshare.com/articles/dataset/_/14138245)
Supplement: Supplementary file 2 [file 1]

**Evidence on vegetative and inflorescence morphology of Chloranthaceae (Angiospermae)  
from the Early Cretaceous (middle-late Albian) of Spain**

Luis Miguel Sender, James A. Doyle, Garland R. Upchurch, Jr., Peter K. Endress, Uxue Villanueva-Amadoz and José B. Diez

**Supplemental Table 1.** Data matrix. **Abbreviations:** **A.** = *Ascarina*; **C.** = *Chloranthus*; **Cst.** = *Chloranthistemon*; **H.** = *Hedyosmum*; **S.** = *Sarcandra*

Letters for uncertain (“polymorphic”) scoring: A = 0/1; B = 0/2; C = 0/5; D = 1/2; E = 1/3

[illegible]
